# Supplementary material for: Childhood tuberculosis is associated with decreased abundance of T cell gene transcripts and impaired T cell function
Source: PLoS One. 2017 Nov 15;12(11):e0185973. doi: 10.1371/journal.pone.0185973 (PMC5687722; doi:10.1371/journal.pone.0185973)
Supplement: S1 File — (XLSX) [file pone.0185973.s002.xlsx]

## Sheet: Index
	Table 1	Details of cohorts studied
	Table 2	Significantly differentially expressed transcripts in TBM patients n=262
	Table 3	Signficantly differentially expressed genes that were validated in both Cohort 1 and Cohort 2 n=129
	Table 4	Biological functions of significantly differentially expressed genes
	Table 5	Key canonical pathways represented in the dataset of significantly differentially expressed genes
	Table 6	Comparison of genes expressed in individual unstimulated cell subpopulations (Waddell et al, 2010) with SDE genes from TBM cases (Cohort 1)
	Table 7	Comparison of genes expressed in PBMCs stimulated with type 1 and 2 interferons and TNF (Waddell et al, 2010) with SDE genes from TBM cases (Cohort 1)
	Table 8	Comparison of genes expressed in cell subtypes stimulated with IFN-g (Waddell et al, 2010) with SDE genes from TBM cases (Cohort 1)
	Table 9	Primers used for quantitative Real Time RT-PCR validation in TBM patients.
	Table 10	TBM vs HC comparison both uncorrected and corrected for cell number (top 30 probes shown).

## Sheet: Table 1
Table 1: Details of cohorts studied
		Cohort	n	Median age (months)	Gender (% male)	Diagnosis
		Discovery
		Cases	9	37	0.67	Tuberculous meningitis (TBM)
		Controls	9	36	0.56	Tuberculosis infection >1 year previous
		Validation
		Cases	13	39	0.57	Tuberculous meningitis (TBM)
			28	64	0.46	Pulmonary tuberculosis
		Controls	14	34	0.46	Healthy controls
		Functional studies
		Cases	35	24	0.66	Tuberculous meningitis (TBM)
			57	21	0.46	Pulmonary tuberculosis (PTB)
			59	53	0.42	Extra pulmonary tuberculosis (EPTB)
		Controls	75	78	38	Healthy controls (HC)

## Sheet: Table 2
Table 2: Significantly differentially expressed transcripts in TBM patients (n=262; 204 unique)
	Rank	HUGO Gene Symbol/Unigene ID	Slope	Direction of regulation	Raw p-value	q-value	fold change (log2)	Gene Description
	1	Hs.534032	0.011105	down	1e-06	0.02	1.9989	T cell receptor gamma constant 2::TCR gamma alternate reading frame protein
	2	GNLY	0.010587	down	3e-06	0.02	1.90566	Granulysin::granulysin
	3	PRF1	0.01047	down	3e-06	0.02	1.8846	Perforin 1 (pore forming protein)::perforin 1 (pore forming protein)
	4	CLC	0.01041	down	3e-06	0.02	1.8738	Charcot-Leyden crystal protein::Charcot-Leyden crystal protein
	5	Hs.534032	0.009966	down	4e-06	0.02087	1.79388	T cell receptor gamma constant 2::TCR gamma alternate reading frame protein
	6	GZMH	0.009922	down	4e-06	0.02087	1.78596	Granzyme H (cathepsin G-like 2, protein h-CCPX)::granzyme H (cathepsin G-like 2, protein h-CCPX)
	7	GZMB	0.009842	down	5e-06	0.02087	1.77156	Granzyme B (granzyme 2, cytotoxic T-lymphocyte-associated serine esterase 1)::granzyme B (granzyme 2, cytotoxic T-lymphocyte-associated serine esterase 1)
	8	IL23A	0.009703	down	6e-06	0.02087	1.74654	interleukin 23, alpha subunit p19::Enhancer of polycomb homolog 1 (Drosophila)
	9	bsid(386802)	0.009342	down	8e-06	0.02087	1.68156	LCP:64
	10	FANCA	-0.009285	up	8e-06	0.02087	-1.6713	Fanconi anemia, complementation group A::Fanconi anemia, complementation group A
	11	IL32	0.009164	down	9e-06	0.02087	1.64952	Interleukin 32::interleukin 32
	12	CTSW	0.009087	down	1e-05	0.02087	1.63566	Cathepsin W::cathepsin W
	13	IL2RB	0.009051	down	1.1e-05	0.02087	1.62918	Interleukin 2 receptor, beta::interleukin 2 receptor, beta
	14	CD27	0.009049	down	1.1e-05	0.02087	1.62882	CD27 molecule::CD27 molecule
	15	IL2RB	0.008796	down	1.2e-05	0.02087	1.58328	Interleukin 2 receptor, beta::interleukin 2 receptor, beta
	16	CD6	0.008757	down	1.3e-05	0.02087	1.57626	CD6 molecule::CD6 molecule
	17	SKAP1	0.008744	down	1.3e-05	0.02087	1.57392	Src kinase associated phosphoprotein 1::src kinase associated phosphoprotein 1
	18	VNN1	-0.008716	up	1.4e-05	0.02087	-1.56888	Vanin 1::vanin 1
	19	HLA-DQA1	0.008682	down	1.4e-05	0.02087	1.56276	Major histocompatibility complex, class II, DQ alpha 1::major histocompatibility complex, class II, DQ alpha 1
	20	TRA	0.008679	down	1.4e-05	0.02087	1.56222	YME1-like 1 (S. cerevisiae)::T cell receptor alpha locus
	21	SELL	0.008621	down	1.5e-05	0.02087	1.55178	Selectin L (lymphocyte adhesion molecule 1)::selectin L
	22	NFATC2	0.008599	down	1.5e-05	0.02087	1.54782	nuclear factor of activated T-cells, cytoplasmic, calcineurin-dependent 2::Nuclear factor of activated T-cells, cytoplasmic, calcineurin-dependent 2
	23	CTSW	0.008564	down	1.6e-05	0.02087	1.54152	Cathepsin W::cathepsin W
	24	CFLAR	0.008499	down	1.8e-05	0.021481	1.52982	CASP8 and FADD-like apoptosis regulator::CASP8 and FADD-like apoptosis regulator
	25	TNFAIP6	-0.008457	up	1.8e-05	0.021481	-1.52226	Tumor necrosis factor, alpha-induced protein 6::tumor necrosis factor, alpha-induced protein 6
	26	IL1R2	-0.008423	up	1.8e-05	0.021481	-1.51614	Interleukin 1 receptor, type II::interleukin 1 receptor, type II
	27	CD8A	0.008409	down	1.9e-05	0.021481	1.51362	CD8a molecule::CD8a molecule
	28	FAIM3	0.008228	down	2.4e-05	0.023429	1.48104	Fas apoptotic inhibitory molecule 3::Fas apoptotic inhibitory molecule 3
	29	DENND2D	0.008214	down	2.4e-05	0.023429	1.47852	DENN/MADD domain containing 2D::DENN/MADD domain containing 2D
	30	LCK	0.008208	down	2.4e-05	0.023429	1.47744	Lymphocyte-specific protein tyrosine kinase::lymphocyte-specific protein tyrosine kinase
	31	Hs.534032	0.0081	down	2.7e-05	0.023429	1.458	T cell receptor gamma constant 2::TCR gamma alternate reading frame protein
	32	TRA	0.008075	down	2.7e-05	0.023429	1.4535	YME1-like 1 (S. cerevisiae)::T cell receptor alpha locus
	33	NKG7	0.00806	down	2.7e-05	0.023429	1.4508	Natural killer cell group 7 sequence::natural killer cell group 7 sequence
	34	LAT	0.008045	down	2.7e-05	0.023429	1.4481	Linker for activation of T cells::linker for activation of T cells
	35	NELL2	0.008043	down	2.7e-05	0.023429	1.44774	NEL-like 2 (chicken)::NEL-like 2 (chicken)
	36	FAIM3	0.007944	down	2.8e-05	0.024444	1.42992	Fas apoptotic inhibitory molecule 3::Fas apoptotic inhibitory molecule 3
	37	S1PR1	0.007875	down	3e-05	0.024865	1.4175	Sphingosine-1-phosphate receptor 1::sphingosine-1-phosphate receptor 1
	38	LTBP4::GIMAP5	0.007841	down	3.1e-05	0.024872	1.41138	Latent transforming growth factor beta binding protein 4::latent transforming growth factor beta binding protein 4::GTPase, IMAP family member 5::GTPase, IMAP family member 5
	39	IL32	0.007832	down	3.1e-05	0.024872	1.40976	Interleukin 32::interleukin 32
	40	RASGRP1	0.007807	down	3.2e-05	0.024878	1.40526	RAS guanyl releasing protein 1 (calcium and DAG-regulated)::RAS guanyl releasing protein 1 (calcium and DAG-regulated)
	41	CX3CR1	0.007799	down	3.3e-05	0.024878	1.40382	Chemokine (C-X3-C motif) receptor 1::chemokine (C-X3-C motif) receptor 1
	42	GPR56	0.007737	down	3.5e-05	0.024884	1.39266	G protein-coupled receptor 56::G protein-coupled receptor 56
	43	CD27	0.007736	down	3.5e-05	0.024884	1.39248	CD27 molecule::CD27 molecule
	44	GZMA	0.007604	down	4.1e-05	0.028043	1.36872	Granzyme A (granzyme 1, cytotoxic T-lymphocyte-associated serine esterase 3)::granzyme A (granzyme 1, cytotoxic T-lymphocyte-associated serine esterase 3)
	45	TRA	0.007595	down	4.2e-05	0.028043	1.3671	YME1-like 1 (S. cerevisiae)::T cell receptor alpha locus
	46	TBX21	0.007584	down	4.2e-05	0.028043	1.36512	T-box 21::T-box 21
	47	LCK	0.007529	down	4.5e-05	0.02875	1.35522	Lymphocyte-specific protein tyrosine kinase::lymphocyte-specific protein tyrosine kinase
	48	IL32	0.00752	down	4.5e-05	0.02875	1.3536	Interleukin 32::interleukin 32
	49	ZAP70	0.007463	down	4.7e-05	0.029	1.34334	Zeta-chain (TCR) associated protein kinase 70kDa::zeta-chain (TCR) associated protein kinase 70kDa
	50	BCL11B	0.007456	down	4.7e-05	0.029	1.34208	B-cell CLL/lymphoma 11B (zinc finger protein)::B-cell CLL/lymphoma 11B (zinc finger protein)
	51	LILRB4	0.007433	down	5e-05	0.03	1.33794	Leukocyte immunoglobulin-like receptor, subfamily B (with TM and ITIM domains), member 4::leukocyte immunoglobulin-like receptor, subfamily B (with TM and ITIM domains), member 4
	52	CD79A	0.007399	down	5.3e-05	0.031538	1.33182	CD79a molecule, immunoglobulin-associated alpha::CD79a molecule, immunoglobulin-associated alpha
	53	bsid(334508)	0.007297	down	6.1e-05	0.03566	1.31346	CDNA FLJ36233 fis, clone THYMU2001291
	54	GZMK	0.007199	down	6.7e-05	0.037931	1.29582	Granzyme K (granzyme 3; tryptase II)::granzyme K (granzyme 3; tryptase II)
	55	RUNX3	0.007181	down	6.8e-05	0.037931	1.29258	Runt-related transcription factor 3::runt-related transcription factor 3
	56	SFRP1	-0.007163	up	7e-05	0.037931	-1.28934	Transcribed locus::secreted frizzled-related protein 1::Secreted frizzled-related protein 1
	57	bsid(363375)	0.007151	down	7.1e-05	0.037931	1.28718	repname(IMAGE:1235200)
	58	LCK	0.007147	down	7.1e-05	0.037931	1.28646	Lymphocyte-specific protein tyrosine kinase::lymphocyte-specific protein tyrosine kinase
	59	IL23A	0.007101	down	7.5e-05	0.039492	1.27818	interleukin 23, alpha subunit p19::Enhancer of polycomb homolog 1 (Drosophila)
	60	CD247	0.007049	down	7.9e-05	0.04	1.26882	CD247 molecule::CD247 molecule
	61	bsid(343734)	0.007041	down	8e-05	0.04	1.26738	repname(IMAGE:2021958)
	62	RUNX3	0.00704	down	8e-05	0.04	1.2672	Runt-related transcription factor 3::runt-related transcription factor 3
	63	CCL5	0.007003	down	8.3e-05	0.040635	1.26054	Chemokine (C-C motif) ligand 5::chemokine (C-C motif) ligand 5
	64	RASGRP1	0.006988	down	8.4e-05	0.040781	1.25784	RAS guanyl releasing protein 1 (calcium and DAG-regulated)::RAS guanyl releasing protein 1 (calcium and DAG-regulated)
	65	RUNX3	0.006891	down	9.3e-05	0.043485	1.24038	Runt-related transcription factor 3::runt-related transcription factor 3
	66	bsid(365043)	0.006884	down	9.3e-05	0.043485	1.23912	repname(ATCC:104977)
	67	CENPF	0.006857	down	9.8e-05	0.045224	1.23426	Centromere protein F, 350/400ka (mitosin)::centromere protein F, 350/400ka (mitosin)
	68	LAT	0.00681	down	0.000102	0.046	1.2258	Linker for activation of T cells::linker for activation of T cells
	69	CD5	0.0068	down	0.000104	0.046	1.224	CD5 molecule::CD5 molecule
	70	ARL4C	0.006795	down	0.000104	0.046	1.2231	ADP-ribosylation factor-like 4C::ADP-ribosylation factor-like 4C
	71	CRIP1	0.006702	down	0.000116	0.050282	1.20636	Cysteine-rich protein 1 (intestinal)::cysteine-rich protein 1 (intestinal)
	72	POLR2B	-0.006691	up	0.000119	0.050685	-1.20438	Polymerase (RNA) II (DNA directed) polypeptide B, 140kDa::polymerase (RNA) II (DNA directed) polypeptide B, 140kDa
	73	HOMER2	0.006682	down	0.00012	0.050685	1.20276	Homer homolog 2 (Drosophila)::homer homolog 2 (Drosophila)
	74	Hs.534032	0.006669	down	0.000123	0.051486	1.20042	T cell receptor gamma constant 2::TCR gamma alternate reading frame protein
	75	POU2AF1	0.00664	down	0.000127	0.052133	1.1952	POU class 2 associating factor 1::POU class 2 associating factor 1
	76	ATM	-0.006605	up	0.00013	0.052987	-1.1889	ataxia telangiectasia mutated::Ataxia telangiectasia mutated::Transcribed locus
	77	MMP9	-0.006592	up	0.000132	0.052987	-1.18656	Matrix metallopeptidase 9 (gelatinase B, 92kDa gelatinase, 92kDa type IV collagenase)::matrix metallopeptidase 9 (gelatinase B, 92kDa gelatinase, 92kDa type IV collagenase)
	78	FCRL3	0.006575	down	0.000134	0.053077	1.1835	Fc receptor-like 3::Fc receptor-like 3
	79	KLRK1	0.00647	down	0.000149	0.056867	1.1646	Killer cell lectin-like receptor subfamily C, member 4::killer cell lectin-like receptor subfamily K, member 1
	80	SKAP1	0.006461	down	0.00015	0.056867	1.16298	Src kinase associated phosphoprotein 1::src kinase associated phosphoprotein 1
	81	ITPKB	0.006451	down	0.000152	0.056867	1.16118	Inositol 1,4,5-trisphosphate 3-kinase B::inositol 1,4,5-trisphosphate 3-kinase B::Transcribed locus
	82	PASK	0.006446	down	0.000152	0.056867	1.16028	PAS domain containing serine/threonine kinase::PAS domain containing serine/threonine kinase
	83	bsid(136500)	0.006444	down	0.000153	0.056867	1.15992	Transcribed locus
	84	IL23A	0.006427	down	0.000156	0.057159	1.15686	interleukin 23, alpha subunit p19::Enhancer of polycomb homolog 1 (Drosophila)
	85	DYRK2	0.006407	down	0.000159	0.057159	1.15326	Dual-specificity tyrosine-(Y)-phosphorylation regulated kinase 2::dual-specificity tyrosine-(Y)-phosphorylation regulated kinase 2
	86	IL7R	0.006399	down	0.000161	0.057159	1.15182	Interleukin 7 receptor::interleukin 7 receptor
	87	CA1	-0.006381	up	0.000162	0.057159	-1.14858	Carbonic anhydrase I::carbonic anhydrase I
	88	IL18R1	-0.006375	up	0.000163	0.057159	-1.1475	Interleukin 18 receptor 1::interleukin 18 receptor 1
	89	SLFN5	0.006359	down	0.000166	0.057609	1.14462	schlafen family member 5::Transcribed locus::Schlafen family member 5
	90	OAS2	0.006355	down	0.000168	0.057609	1.1439	2'-5'-oligoadenylate synthetase 2, 69/71kDa::2'-5'-oligoadenylate synthetase 2, 69/71kDa
	91	ARL4C	0.00634	down	0.000171	0.057609	1.1412	ADP-ribosylation factor-like 4C::ADP-ribosylation factor-like 4C
	92	SIAH2	-0.00634	up	0.000171	0.057609	-1.1412	Seven in absentia homolog 2 (Drosophila)::seven in absentia homolog 2 (Drosophila)
	93	FCGR1A::FCGR1B	-0.00629	up	0.000182	0.060645	-1.1322	Fc fragment of IgG, high affinity Ia, receptor (CD64)::Fc fragment of IgG, high affinity Ia, receptor (CD64)::Fc fragment of IgG, high affinity Ib, receptor (CD64)::Fc fragment of IgG, high affinity Ib, receptor (CD64)
	94	SIAH2	-0.006253	up	0.00019	0.062447	-1.12554	Seven in absentia homolog 2 (Drosophila)::seven in absentia homolog 2 (Drosophila)
	95	bsid(373725)	0.006237	down	0.000194	0.0625	1.12266	Transcribed locus
	96	HP	-0.006237	up	0.000194	0.0625	-1.12266	haptoglobin::Haptoglobin
	97	VSIG4	-0.006195	up	0.000203	0.063832	-1.1151	V-set and immunoglobulin domain containing 4::V-set and immunoglobulin domain containing 4
	98	TCF7	0.006181	down	0.000205	0.063832	1.11258	Transcription factor 7 (T-cell specific, HMG-box)::transcription factor 7 (T-cell specific, HMG-box)
	99	bsid(327613)	0.006175	down	0.000206	0.063832	1.1115	repname(IMAGE:686574)
	100	IL10RA	0.00616	down	0.000211	0.063832	1.1088	Interleukin 10 receptor, alpha::interleukin 10 receptor, alpha::Transcribed locus
	101	TMC8	0.006151	down	0.000213	0.063832	1.10718	Transmembrane channel-like 8::transmembrane channel-like 8
	102	bsid(370934)	0.006148	down	0.000213	0.063832	1.10664	Transcribed locus
	103	TNFRSF10A	-0.00613	up	0.000216	0.063832	-1.1034	Tumor necrosis factor receptor superfamily, member 10a::tumor necrosis factor receptor superfamily, member 10a
	104	MAPRE2	0.006121	down	0.000219	0.063832	1.10178	Microtubule-associated protein, RP/EB family, member 2::microtubule-associated protein, RP/EB family, member 2::Transcribed locus, strongly similar to XP_001161179.1 PREDICTED: hypothetical protein [Pan troglodytes]
	105	PIK3IP1	0.006121	down	0.000219	0.063832	1.10178	Phosphoinositide-3-kinase interacting protein 1::phosphoinositide-3-kinase interacting protein 1
	106	SAMSN1	-0.006115	up	0.000221	0.063832	-1.1007	SAM domain, SH3 domain and nuclear localization signals 1::SAM domain, SH3 domain and nuclear localization signals 1
	107	CD27	0.006111	down	0.000221	0.063832	1.09998	CD27 molecule::CD27 molecule
	108	IL10RA	0.006069	down	0.00023	0.065179	1.09242	Interleukin 10 receptor, alpha::interleukin 10 receptor, alpha
	109	RGS20	-0.006064	up	0.000232	0.065179	-1.09152	Regulator of G-protein signaling 20::regulator of G-protein signaling 20
	110	TCF7	0.00606	down	0.000233	0.065179	1.0908	Transcription factor 7 (T-cell specific, HMG-box)::transcription factor 7 (T-cell specific, HMG-box)
	111	bsid(360149)	0.006042	down	0.000235	0.065179	1.08756	MRNA, chromosome 1 specific transcript KIAA0486
	112	HIST2H2AA3	-0.006039	up	0.000236	0.065179	-1.08702	Histone cluster 2, H2aa3::histone cluster 2, H2aa3::Transcribed locus, moderately similar to NP_001025924.1 histone H2A [Gallus gallus]
	113	CD79B	0.00602	down	0.000241	0.065439	1.0836	CD79b molecule, immunoglobulin-associated beta::CD79b molecule, immunoglobulin-associated beta
	114	ARL4C	0.006019	down	0.000241	0.065439	1.08342	ADP-ribosylation factor-like 4C::ADP-ribosylation factor-like 4C
	115	H2AFX	-0.005979	up	0.000254	0.067586	-1.07622	H2A histone family, member X::H2A histone family, member X
	116	MMP9	-0.005979	up	0.000254	0.067586	-1.07622	Matrix metallopeptidase 9 (gelatinase B, 92kDa gelatinase, 92kDa type IV collagenase)::matrix metallopeptidase 9 (gelatinase B, 92kDa gelatinase, 92kDa type IV collagenase)
	117	KLRC2	0.005946	down	0.000266	0.069746	1.07028	Killer cell lectin-like receptor subfamily C, member 2::killer cell lectin-like receptor subfamily C, member 2
	118	CD3G	0.005944	down	0.000266	0.069746	1.06992	CD3g molecule, gamma (CD3-TCR complex)::CD3g molecule, gamma (CD3-TCR complex)
	119	BCL11B	0.00594	down	0.000269	0.069748	1.0692	Transcribed locus::B-cell CLL/lymphoma 11B (zinc finger protein)::B-cell CLL/lymphoma 11B (zinc finger protein)
	120	FAM102A	0.005911	down	0.000278	0.070984	1.06398	Family with sequence similarity 102, member A::family with sequence similarity 102, member A
	121	NFATC2	0.005904	down	0.00028	0.070984	1.06272	nuclear factor of activated T-cells, cytoplasmic, calcineurin-dependent 2::Nuclear factor of activated T-cells, cytoplasmic, calcineurin-dependent 2
	122	CECR1	0.0059	down	0.00028	0.070984	1.062	Cat eye syndrome chromosome region, candidate 1::cat eye syndrome chromosome region, candidate 1
	123	ZNF598	-0.005878	up	0.000285	0.071452	-1.05804	Zinc finger protein 598::zinc finger protein 598
	124	NLRC3	0.005869	down	0.000287	0.071452	1.05642	NLR family, CARD domain containing 3::NLR family, CARD domain containing 3::Transcribed locus
	125	LBH	0.005858	down	0.000292	0.071628	1.05444	Limb bud and heart development homolog (mouse)::limb bud and heart development homolog (mouse)
	126	IL7R	0.005855	down	0.000293	0.071628	1.0539	Interleukin 7 receptor::interleukin 7 receptor
	127	BACH2	0.005842	down	0.000298	0.071628	1.05156	BTB and CNC homology 1, basic leucine zipper transcription factor 2::BTB and CNC homology 1, basic leucine zipper transcription factor 2
	128	PTPN4	0.005841	down	0.000298	0.071628	1.05138	Protein tyrosine phosphatase, non-receptor type 4 (megakaryocyte)::protein tyrosine phosphatase, non-receptor type 4 (megakaryocyte)
	129	MMP2	-0.005839	up	0.000299	0.071628	-1.05102	Matrix metallopeptidase 2 (gelatinase A, 72kDa gelatinase, 72kDa type IV collagenase)::matrix metallopeptidase 2 (gelatinase A, 72kDa gelatinase, 72kDa type IV collagenase)
	130	NFATC2	0.005827	down	0.000304	0.07219	1.04886	nuclear factor of activated T-cells, cytoplasmic, calcineurin-dependent 2::Nuclear factor of activated T-cells, cytoplasmic, calcineurin-dependent 2::Transcribed locus
	131	bsid(375591)	0.00581	down	0.000311	0.07219	1.0458	repname(IMAGE:1317260)
	132	MAF	0.005805	down	0.000313	0.07219	1.0449	v-maf musculoaponeurotic fibrosarcoma oncogene homolog (avian)::V-maf musculoaponeurotic fibrosarcoma oncogene homolog (avian)
	133	FLT3LG	0.005805	down	0.000313	0.07219	1.0449	Fms-related tyrosine kinase 3 ligand::fms-related tyrosine kinase 3 ligand
	134	IL7R	0.005785	down	0.000319	0.07219	1.0413	interleukin 7 receptor::Interleukin 7 receptor::Transcribed locus, strongly similar to NP_002176.2 interleukin 7 receptor precursor [Homo sapiens]
	135	HLA-DQA1	0.005783	down	0.00032	0.07219	1.04094	Major histocompatibility complex, class II, DQ alpha 1::major histocompatibility complex, class II, DQ alpha 1
	136	CTSK	0.00578	down	0.00032	0.07219	1.0404	Cathepsin K::cathepsin K
	137	IL16	0.005777	down	0.00032	0.07219	1.03986	Interleukin 16 (lymphocyte chemoattractant factor)::interleukin 16 (lymphocyte chemoattractant factor)
	138	KSR1	-0.005752	up	0.000329	0.073214	-1.03536	Kinase suppressor of ras 1::kinase suppressor of ras 1
	139	CD8B	0.005747	down	0.000331	0.073214	1.03446	CD8b molecule::CD8b molecule
	140	RNASE1	-0.005746	up	0.000332	0.073214	-1.03428	Ribonuclease, RNase A family, 1 (pancreatic)::ribonuclease, RNase A family, 1 (pancreatic)
	141	CXCR5	0.005733	down	0.000336	0.07331	1.03194	Chemokine (C-X-C motif) receptor 5::chemokine (C-X-C motif) receptor 5
	142	bsid(182939)	-0.00573	up	0.000337	0.07331	-1.0314	Transcribed locus
	143	bsid(110679)	0.005717	down	0.000342	0.073846	1.02906	repname(IMAGE:2306655)
	144	HNF1B	-0.005707	up	0.000345	0.074097	-1.02726	HNF1 homeobox B::HNF1 homeobox B
	145	ITPKB	0.005695	down	0.000352	0.074966	1.0251	inositol 1,4,5-trisphosphate 3-kinase B::Inositol 1,4,5-trisphosphate 3-kinase B
	146	KLRG1	0.005681	down	0.000357	0.075034	1.02258	Killer cell lectin-like receptor subfamily G, member 1::killer cell lectin-like receptor subfamily G, member 1
	147	KLRB1	0.005681	down	0.000357	0.075034	1.02258	Killer cell lectin-like receptor subfamily B, member 1::killer cell lectin-like receptor subfamily B, member 1
	148	USP10	-0.005672	up	0.000361	0.075473	-1.02096	Ubiquitin specific peptidase 10::ubiquitin specific peptidase 10
	149	GLG1	-0.005662	up	0.000365	0.075705	-1.01916	Golgi apparatus protein 1::golgi apparatus protein 1
	150	SMARCD3	-0.005645	up	0.000371	0.076533	-1.0161	SWI/SNF related, matrix associated, actin dependent regulator of chromatin, subfamily d, member 3::SWI/SNF related, matrix associated, actin dependent regulator of chromatin, subfamily d, member 3
	151	ABLIM1	0.005629	down	0.000378	0.076667	1.01322	Actin binding LIM protein 1::actin binding LIM protein 1
	152	bsid(335478)	0.005626	down	0.000379	0.076667	1.01268	repname(IMAGE:1967096)
	153	CD3D	0.005626	down	0.00038	0.076667	1.01268	CD3d molecule, delta (CD3-TCR complex)::CD3d molecule, delta (CD3-TCR complex)
	154	bsid(400777)	-0.005614	up	0.000386	0.076859	-1.01052	repname(IMAGE:1289626)
	155	ITGAL	0.005614	down	0.000386	0.076859	1.01052	Integrin, alpha L (antigen CD11A (p180), lymphocyte function-associated antigen 1; alpha polypeptide)::integrin, alpha L (antigen CD11A (p180), lymphocyte function-associated antigen 1; alpha polypeptide)
	156	SLAMF7	0.005603	down	0.000388	0.076859	1.00854	SLAM family member 7::SLAM family member 7::Transcribed locus
	157	NLRC3	0.005576	down	0.000403	0.079062	1.00368	NLR family, CARD domain containing 3::NLR family, CARD domain containing 3::Transcribed locus
	158	MLL	0.005572	down	0.000405	0.079062	1.00296	Myeloid/lymphoid or mixed-lineage leukemia (trithorax homolog, Drosophila)::myeloid/lymphoid or mixed-lineage leukemia (trithorax homolog, Drosophila)
	159	SIT1	0.005563	down	0.000408	0.079062	1.00134	signaling threshold regulating transmembrane adaptor 1::Signaling threshold regulating transmembrane adaptor 1
	160	LHFPL2	-0.00556	up	0.000409	0.079062	-1.0008	Lipoma HMGIC fusion partner-like 2::lipoma HMGIC fusion partner-like 2
	161	NCR3	0.005521	down	0.000425	0.079824	0.99378	Natural cytotoxicity triggering receptor 3::natural cytotoxicity triggering receptor 3
	162	RASGRP1	0.00551	down	0.00043	0.079824	0.9918	RAS guanyl releasing protein 1 (calcium and DAG-regulated)::RAS guanyl releasing protein 1 (calcium and DAG-regulated)
	163	IL23A	0.005504	down	0.000434	0.079824	0.99072	interleukin 23, alpha subunit p19::Enhancer of polycomb homolog 1 (Drosophila)
	164	TCN2	-0.005497	up	0.000436	0.079824	-0.98946	Transcobalamin II; macrocytic anemia::transcobalamin II; macrocytic anemia
	165	GYG1	-0.005496	up	0.000437	0.079824	-0.98928	Glycogenin 1::glycogenin 1
	166	MIAT	0.005494	down	0.000438	0.079824	0.98892	myocardial infarction associated transcript (non-protein coding)::Myocardial infarction associated transcript (non-protein coding)
	167	POU2F2	0.005493	down	0.000438	0.079824	0.98874	POU class 2 homeobox 2::POU class 2 homeobox 2
	168	bsid(388653)	0.005493	down	0.000438	0.079824	0.98874	Transcribed locus
	169	CBX4	-0.005488	up	0.000439	0.079824	-0.98784	chromobox homolog 4 (Pc class homolog, Drosophila)::Chromobox homolog 4 (Pc class homolog, Drosophila)
	170	bsid(377475)	-0.005486	up	0.000439	0.079824	-0.98748	Transcribed locus
	171	SLC22A4::TUBA1B	-0.005476	up	0.000444	0.080234	-0.98568	Solute carrier family 22 (organic cation/ergothioneine transporter), member 4::solute carrier family 22 (organic cation/ergothioneine transporter), member 4::tubulin, alpha 1b::Tubulin, alpha 1b
	172	C6orf182	-0.005467	up	0.000447	0.080407	-0.98406	Chromosome 6 open reading frame 182::chromosome 6 open reading frame 182
	173	CREG1	-0.005449	up	0.000459	0.081494	-0.98082	Cellular repressor of E1A-stimulated genes 1::cellular repressor of E1A-stimulated genes 1::Transcribed locus
	174	CD27	0.005449	down	0.000459	0.081494	0.98082	CD27 molecule::CD27 molecule
	175	BCL6	-0.005431	up	0.000469	0.082857	-0.97758	B-cell CLL/lymphoma 6 (zinc finger protein 51)::B-cell CLL/lymphoma 6 (zinc finger protein 51)
	176	CCL5	0.005424	down	0.000474	0.083182	0.97632	Chemokine (C-C motif) ligand 5::chemokine (C-C motif) ligand 5
	177	TMC6	0.005419	down	0.000477	0.083333	0.97542	Transmembrane channel-like 6::transmembrane channel-like 6
	178	bsid(368825)	0.005384	down	0.000493	0.085562	0.96912	CDNA FLJ11650 fis, clone HEMBA1004433
	179	IL16	0.005377	down	0.000496	0.085587	0.96786	Interleukin 16 (lymphocyte chemoattractant factor)::interleukin 16 (lymphocyte chemoattractant factor)
	180	bsid(395282)	0.005349	down	0.000512	0.0874	0.96282	repname(IMAGE:1337224)
	181	bsid(407959)	0.005338	down	0.000518	0.0874	0.96084	repname(IMAGE:1968266)
	182	bsid(133743)	0.005336	down	0.000519	0.0874	0.96048	Transcribed locus, strongly similar to XP_001161658.1 PREDICTED: choline/ethanolaminephosphotransferase isoform 6 [Pan troglodytes]::Transcribed locus, moderately similar to XP_001372821.1 PREDICTED: similar to Choline/ethanolamine phosphotransferase 1 [Mo
	183	CD3D	0.005333	down	0.00052	0.0874	0.95994	CD3d molecule, delta (CD3-TCR complex)::CD3d molecule, delta (CD3-TCR complex)
	184	CD1C	0.005322	down	0.000524	0.0874	0.95796	CD1c molecule::CD1c molecule
	185	TCF7	0.00532	down	0.000524	0.0874	0.9576	Transcription factor 7 (T-cell specific, HMG-box)::transcription factor 7 (T-cell specific, HMG-box)
	186	ST3GAL6	-0.005317	up	0.000526	0.0874	-0.95706	ST3 beta-galactoside alpha-2,3-sialyltransferase 6::ST3 beta-galactoside alpha-2,3-sialyltransferase 6
	187	WNT5A	0.005307	down	0.000535	0.0874	0.95526	wingless-type MMTV integration site family, member 5A::Wingless-type MMTV integration site family, member 5A
	188	CHI3L2	0.005304	down	0.000537	0.0874	0.95472	Chitinase 3-like 2::chitinase 3-like 2
	189	CHPT1	-0.005302	up	0.000538	0.0874	-0.95436	Choline phosphotransferase 1::choline phosphotransferase 1
	190	GPR114	0.005294	down	0.000543	0.0874	0.95292	G protein-coupled receptor 114::G protein-coupled receptor 114
	191	VEGFA	-0.005291	up	0.000545	0.0874	-0.95238	Vascular endothelial growth factor A::vascular endothelial growth factor A
	192	IGHG1	0.005284	down	0.000548	0.0874	0.95112	Immunoglobulin heavy constant mu::immunoglobulin heavy constant gamma 1 (G1m marker)
	193	bsid(392288)	-0.005282	up	0.000548	0.0874	-0.95076	repname(IMAGE:1355098)
	194	LY96	-0.005278	up	0.00055	0.0874	-0.95004	lymphocyte antigen 96::Lymphocyte antigen 96
	195	NUPL1	-0.005274	up	0.000554	0.0874	-0.94932	nucleoporin like 1::Nucleoporin like 1
	196	CD3G	0.005269	down	0.000557	0.0874	0.94842	CD3g molecule, gamma (CD3-TCR complex)::CD3g molecule, gamma (CD3-TCR complex)
	197	bsid(84192)	-0.005259	up	0.000563	0.0874	-0.94662	repname(IMAGE:712604)
	198	bsid(397751)	-0.005258	up	0.000563	0.0874	-0.94644	repname(IMAGE:1235120)
	199	CLEC2D	0.005255	down	0.000565	0.0874	0.9459	C-type lectin domain family 2, member D::C-type lectin domain family 2, member D
	200	ITIH2	-0.005254	up	0.000566	0.0874	-0.94572	Inter-alpha (globulin) inhibitor H2::inter-alpha (globulin) inhibitor H2
	201	TMEM158	-0.005246	up	0.000569	0.087562	-0.94428	Transmembrane protein 158::transmembrane protein 158::Transcribed locus, strongly similar to NP_033135.2 ryanodine receptor 1, skeletal muscle [Mus musculus]
	202	DNASE1L3	0.005237	down	0.000575	0.08802	0.94266	Deoxyribonuclease I-like 3::deoxyribonuclease I-like 3
	203	SRD5A1	-0.005208	up	0.000597	0.090195	-0.93744	Steroid-5-alpha-reductase, alpha polypeptide 1 (3-oxo-5 alpha-steroid delta 4-dehydrogenase alpha 1)::steroid-5-alpha-reductase, alpha polypeptide 1 (3-oxo-5 alpha-steroid delta 4-dehydrogenase alpha 1)
	204	KAL1	-0.005207	up	0.000597	0.090195	-0.93726	Kallmann syndrome 1 sequence::Kallmann syndrome 1 sequence
	205	DUSP1	-0.005204	up	0.000598	0.090195	-0.93672	Dual specificity phosphatase 1::dual specificity phosphatase 1
	206	ICAM2	0.005191	down	0.000607	0.090946	0.93438	Intercellular adhesion molecule 2::intercellular adhesion molecule 2
	207	bsid(359981)	0.00519	down	0.000609	0.090946	0.9342	repname(IMAGE:1251237)
	208	RAD21	-0.005181	up	0.000618	0.090946	-0.93258	RAD21 homolog (S. pombe)::RAD21 homolog (S. pombe)
	209	KIAA1598	-0.005172	up	0.000627	0.090946	-0.93096	KIAA1598::KIAA1598
	210	HLA-DMA	0.005171	down	0.000627	0.090946	0.93078	Major histocompatibility complex, class II, DM alpha::major histocompatibility complex, class II, DM alpha
	211	bsid(363592)	0.00517	down	0.000628	0.090946	0.9306	repname(IMAGE:2134392)
	212	EVI1	-0.005163	up	0.000633	0.090946	-0.92934	ecotropic viral integration site 1::Ecotropic viral integration site 1
	213	KIAA0194::CSF1R	0.00516	down	0.000636	0.090946	0.9288	KIAA0194 protein::KIAA0194 protein::colony stimulating factor 1 receptor, formerly McDonough feline sarcoma viral (v-fms) oncogene homolog::Colony stimulating factor 1 receptor, formerly McDonough feline sarcoma viral (v-fms) oncogene homolog
	214	SAMSN1	-0.005153	up	0.000639	0.090946	-0.92754	SAM domain, SH3 domain and nuclear localization signals 1::SAM domain, SH3 domain and nuclear localization signals 1
	215	IL23A	0.005151	down	0.00064	0.090946	0.92718	interleukin 23, alpha subunit p19::Enhancer of polycomb homolog 1 (Drosophila)
	216	MAP4K1	0.005151	down	0.00064	0.090946	0.92718	Mitogen-activated protein kinase kinase kinase kinase 1::mitogen-activated protein kinase kinase kinase kinase 1
	217	BCL2	0.005149	down	0.000644	0.090946	0.92682	B-cell CLL/lymphoma 2::B-cell CLL/lymphoma 2
	218	bsid(331026)	0.005144	down	0.000647	0.090946	0.92592	Transcribed locus
	219	bsid(402565)	0.005142	down	0.000648	0.090946	0.92556	repname(IMAGE:1672022)
	220	bsid(362229)	0.005137	down	0.000651	0.090946	0.92466	Transcribed locus
	221	ITK	0.005136	down	0.000653	0.090946	0.92448	IL2-inducible T-cell kinase::IL2-inducible T-cell kinase
	222	ITPKB	0.005135	down	0.000653	0.090946	0.9243	inositol 1,4,5-trisphosphate 3-kinase B::Inositol 1,4,5-trisphosphate 3-kinase B
	223	FYN	0.005126	down	0.00066	0.091205	0.92268	FYN oncogene related to SRC, FGR, YES::FYN oncogene related to SRC, FGR, YES
	224	CYFIP2	0.005125	down	0.000661	0.091205	0.9225	Cytoplasmic FMR1 interacting protein 2::cytoplasmic FMR1 interacting protein 2
	225	DUSP1	-0.00512	up	0.000664	0.091244	-0.9216	Dual specificity phosphatase 1::dual specificity phosphatase 1
	226	bsid(7930)	-0.0051	up	0.000678	0.092655	-0.918	Transcribed locus
	227	PASK	0.00509	down	0.000684	0.093172	0.9162	PAS domain containing serine/threonine kinase::PAS domain containing serine/threonine kinase
	228	ATM	0.005076	down	0.000696	0.093565	0.91368	ataxia telangiectasia mutated::Ataxia telangiectasia mutated::Transcribed locus
	229	bsid(21900)	-0.005076	up	0.000696	0.093565	-0.91368	Transcribed locus
	230	bsid(373634)	0.005076	down	0.000696	0.093565	0.91368	Transcribed locus
	231	DENND1C	0.005063	down	0.00071	0.094592	0.91134	DENN/MADD domain containing 1C::DENN/MADD domain containing 1C
	232	CHI3L2	0.005061	down	0.000711	0.094592	0.91098	Chitinase 3-like 2::chitinase 3-like 2
	233	MLL	0.005058	down	0.000713	0.094592	0.91044	Myeloid/lymphoid or mixed-lineage leukemia (trithorax homolog, Drosophila)::myeloid/lymphoid or mixed-lineage leukemia (trithorax homolog, Drosophila)
	234	TMC6	0.005052	down	0.000721	0.095214	0.90936	Transmembrane channel-like 6::transmembrane channel-like 6
	235	bsid(346380)	0.005034	down	0.000738	0.096333	0.90612	repname(LCP:67)
	236	FCRL5	0.005029	down	0.00074	0.096333	0.90522	Fc receptor-like 5::Fc receptor-like 5
	237	MAP4K1	0.005029	down	0.000741	0.096333	0.90522	Mitogen-activated protein kinase kinase kinase kinase 1::mitogen-activated protein kinase kinase kinase kinase 1
	238	SLC7A5	-0.005025	up	0.000744	0.096333	-0.9045	Solute carrier family 7 (cationic amino acid transporter, y+ system), member 5::solute carrier family 7 (cationic amino acid transporter, y+ system), member 5
	239	KLRG1	0.005022	down	0.000747	0.096333	0.90396	Killer cell lectin-like receptor subfamily G, member 1::killer cell lectin-like receptor subfamily G, member 1
	240	LOC100131120	-0.005019	up	0.000748	0.096333	-0.90342	PRO1828::PRO1828
	241	TSPAN32	0.005012	down	0.000755	0.096846	0.90216	Tetraspanin 32::tetraspanin 32
	242	bsid(393043)	0.005006	down	0.000761	0.097231	0.90108	Transcribed locus
	243	bsid(328046)	0.005001	down	0.000767	0.097469	0.90018	Transcribed locus
	244	IL16	0.004998	down	0.00077	0.097469	0.89964	Interleukin 16 (lymphocyte chemoattractant factor)::interleukin 16 (lymphocyte chemoattractant factor)
	245	bsid(360374)	0.004993	down	0.000773	0.097469	0.89874	repname(IMAGE:2132257)
	246	IL10RA	0.00498	down	0.000788	0.09814	0.8964	Interleukin 10 receptor, alpha::interleukin 10 receptor, alpha
	247	RBM47	-0.004975	up	0.000793	0.09814	-0.8955	RNA binding motif protein 47::RNA binding motif protein 47
	248	bsid(364990)	0.004972	down	0.000796	0.09814	0.89496	repname(IMAGE:2044557)
	249	HIST1H2AC	-0.004972	up	0.000796	0.09814	-0.89496	Histone cluster 1, H2ac::histone cluster 1, H2ac
	250	SOAT2	-0.00497	up	0.000798	0.09814	-0.8946	sterol O-acyltransferase 2::Sterol O-acyltransferase 2
	251	NAPSB	0.004969	down	0.000799	0.09814	0.89442	napsin B aspartic peptidase pseudogene::Napsin B aspartic peptidase pseudogene
	252	AREG	-0.004962	up	0.000806	0.09814	-0.89316	amphiregulin (schwannoma-derived growth factor)::Amphiregulin (schwannoma-derived growth factor)
	253	NAMPT	-0.004959	up	0.000807	0.09814	-0.89262	Nicotinamide phosphoribosyltransferase::nicotinamide phosphoribosyltransferase
	254	TATDN2	0.004957	down	0.000807	0.09814	0.89226	TatD DNase domain containing 2::TatD DNase domain containing 2
	255	STAU1	0.004952	down	0.000811	0.09814	0.89136	staufen, RNA binding protein, homolog 1 (Drosophila)::Staufen, RNA binding protein, homolog 1 (Drosophila)
	256	CDC25B	0.004945	down	0.000816	0.09814	0.8901	Cell division cycle 25 homolog B (S. pombe)::cell division cycle 25 homolog B (S. pombe)
	257	bsid(126052)	-0.004945	up	0.000816	0.09814	-0.8901	CDNA FLJ35491 fis, clone SMINT2008625, moderately similar to GLYCINE CLEAVAGE SYSTEM H PROTEIN PRECURSOR
	258	MYOM2	0.00494	down	0.000819	0.09814	0.8892	Myomesin (M-protein) 2, 165kDa::myomesin (M-protein) 2, 165kDa
	259	bsid(109662)	0.004931	down	0.000829	0.098885	0.88758	Transcribed locus, strongly similar to NP_115758.3 component of oligomeric golgi complex 8 [Homo sapiens]
	260	FYN	0.004929	down	0.000832	0.098885	0.88722	FYN oncogene related to SRC, FGR, YES::FYN oncogene related to SRC, FGR, YES
	261	DUSP1	-0.004916	up	0.000843	0.099847	-0.88488	Dual specificity phosphatase 1::dual specificity phosphatase 1
	262	TGFBR3	0.004913	down	0.000847	0.099962	0.88434	Transforming growth factor, beta receptor III::transforming growth factor, beta receptor III

## Sheet: Table 3
Table 3: Signficantly differentially expressed genes that were validated in both Cohort 1 and Cohort 2 (n=129)
	Gene	logFC	t-statistic	adj.P.Val
	GNLY	-1.80636	-6.18855	8.8e-07
	PRF1	-1.40827	-4.79393	9.1e-05
	CLC	-1.08842	-3.27384	0.00731929
	GZMH	-1.28414	-4.25336	0.000488722
	GZMB	-1.54817	-5.00978	4.48e-05
	FANCA	2.32631	7.75673	3.27e-09
	IL32	-1.04683	-4.79853	8.95e-05
	CTSW	-1.70414	-5.97573	1.76e-06
	IL2RB	-1.80474	-6.64408	1.69e-07
	CD6	-1.37704	-5.83567	2.84e-06
	VNN1	1.86752	5.71384	4.35e-06
	HLA-DQA1	-0.738826	-2.90595	0.0177719
	TRA	-1.41825	-6.00004	1.63e-06
	SELL	-0.478005	-3.0342	0.0131448
	NFATC2	-1.37845	-8.17953	7.84e-10
	CFLAR	-1.30757	-6.26803	6.32e-07
	TNFAIP6	1.40102	4.7632	0.00010128
	IL1R2	2.16779	8.05258	1.21e-09
	CD8A	-1.10408	-4.40069	0.000313993
	DENND2D	-1.62734	-8.32456	4.61e-10
	LCK	-1.17155	-5.77045	3.56e-06
	NKG7	-0.762419	-3.2148	0.00842683
	LAT	-0.999514	-5.7929	3.3e-06
	NELL2	-1.37646	-5.57441	6.95e-06
	RASGRP1	-0.981397	-4.28323	0.000450329
	CX3CR1	-0.616425	-3.09516	0.0113605
	GPR56	-1.5778	-7.98764	1.55e-09
	GZMA	-1.09178	-4.05944	0.000861437
	TBX21	-0.986502	-3.55462	0.00350592
	ZAP70	-0.980887	-5.38758	1.3e-05
	BCL11B	-1.27534	-6.7627	1.08e-07
	GZMK	-1.75383	-6.03315	1.58e-06
	RUNX3	-0.992647	-5.74811	4.05e-06
	SFRP1	-0.836022	-8.43285	2.91e-10
	CD247	-1.07019	-4.90652	6.26e-05
	CCL5	-0.847715	-5.54508	7.64e-06
	CENPF	0.526839	3.0013	0.0142518
	CD5	-1.38406	-8.01649	1.42e-09
	ARL4C	-1.17723	-5.74378	3.89e-06
	CRIP1	-0.638906	-3.28168	0.0071251
	POLR2B	0.593781	3.69479	0.00243414
	HOMER2	-0.859466	-2.96919	0.0153076
	POU2AF1	-0.321697	-3.30971	0.0066175
	ATM	1.0511	2.88463	0.0186562
	MMP9	1.53254	4.85358	7.64e-05
	FCRL3	-1.60722	-7.49926	7.47e-09
	ITPKB	0.964411	6.53334	2.49e-07
	PASK	-1.08117	-6.04199	1.41e-06
	DYRK2	-1.17985	-6.82606	8.9e-08
	IL7R	-0.832159	-3.73353	0.00217056
	IL18R1	1.43189	4.7372	0.000108656
	SLFN5	-0.835185	-4.28162	0.000449886
	OAS2	-1.526	-6.79654	9.6e-08
	SIAH2	0.777837	3.45217	0.00458454
	HP	1.14116	3.64517	0.00274285
	VSIG4	1.5741	5.66887	5.05e-06
	TCF7	-1.14952	-6.68324	1.44e-07
	IL10RA	-1.02918	-6.51715	2.61e-07
	TMC8	-0.884229	-5.5038	8.85e-06
	TNFRSF10A	1.42654	4.19013	0.000593133
	MAPRE2	-0.808562	-6.55667	2.35e-07
	SAMSN1	1.22271	4.93753	5.66e-05
	RGS20	1.58331	6.08004	1.22e-06
	HIST2H2AA3	0.970674	4.05982	0.000861437
	H2AFX	0.570646	3.46408	0.00444916
	KLRC2	-1.16933	-5.10206	3.35e-05
	CD3G	-0.996255	-5.75503	3.77e-06
	FAM102A	-0.940984	-6.14579	9.67e-07
	CECR1	-0.465978	-2.54329	0.0392775
	ZNF598	1.44422	5.83572	2.84e-06
	LBH	-0.844755	-4.2042	0.000564708
	BACH2	-0.651903	-6.59091	2.04e-07
	PTPN4	-0.603111	-3.47459	0.00432086
	MMP2	0.712732	3.09559	0.0113709
	MAF	-1.15873	-9.45925	4.82e-12
	FLT3LG	-0.640179	-4.80682	8.71e-05
	CTSK	-0.670396	-4.64237	0.000147163
	IL16	-0.983376	-5.78268	3.4e-06
	KSR1	1.53769	7.07992	3.53e-08
	CD8B	-1.50923	-7.82859	2.51e-09
	RNASE1	1.42449	5.50491	8.91e-06
	KLRG1	-1.2413	-7.03844	4.18e-08
	KLRB1	-0.974882	-3.82291	0.00169104
	USP10	1.15126	5.70108	4.75e-06
	GLG1	1.55593	8.12571	9.48e-10
	ABLIM1	-0.786596	-4.05137	0.000880753
	CD3D	-0.875693	-4.74558	0.000106047
	ITGAL	-0.667203	-3.95055	0.00117431
	SLAMF7	-0.860477	-3.77776	0.00191304
	MLL	-0.880313	-6.41907	3.68e-07
	SIT1	-0.791304	-3.81644	0.00171368
	LHFPL2	-1.12086	-6.67041	1.52e-07
	NCR3	-1.58464	-8.84573	7.79e-11
	TCN2	1.07593	4.16415	0.000635432
	GYG1	0.814406	3.91419	0.00130917
	POU2F2	0.356633	2.91046	0.0175803
	CBX4	0.681974	4.32675	0.000392565
	C6orf182	0.641767	3.49268	0.00412636
	CREG1	0.774959	4.53041	0.000208221
	BCL6	1.72112	8.20145	7.42e-10
	TMC6	-0.626745	-4.7293	0.000111224
	CD1C	0.311378	2.7724	0.0239947
	ST3GAL6	-0.292076	-3.05761	0.0124296
	WNT5A	-0.50117	-2.80778	0.0221594
	CHI3L2	-0.534097	-4.86968	7.09e-05
	CHPT1	0.394221	3.09148	0.0114668
	IGHG1	-0.753652	-4.24683	0.000496781
	LY96	1.49549	5.94386	1.99e-06
	CLEC2D	-1.15057	-7.39756	1.07e-08
	DNASE1L3	-0.677113	-4.46344	0.000257678
	KAL1	1.26003	6.0126	1.65e-06
	DUSP1	1.63425	8.16155	8.11e-10
	ICAM2	-0.745601	-4.6913	0.000125582
	RAD21	-0.444668	-4.18931	0.000598263
	EVI1	0.790581	3.45056	0.00460417
	MAP4K1	-0.951847	-6.96259	5.41e-08
	BCL2	-0.603402	-3.00466	0.0141132
	ITK	-0.929868	-4.70325	0.000120983
	FYN	-0.776498	-5.37488	1.35e-05
	CYFIP2	-0.622168	-4.64975	0.000143709
	FCRL5	-0.485582	-4.43291	0.000283283
	TSPAN32	-0.691008	-4.77891	9.54e-05
	HIST1H2AC	1.02698	5.48037	9.46e-06
	AREG	0.733135	4.35459	0.000363924
	TATDN2	-1.02252	-8.2837	5.19e-10
	STAU1	-1.05406	-7.01152	4.61e-08
	CDC25B	-1.04355	-5.89673	2.34e-06
	MYOM2	-0.820595	-3.52572	0.00378695
	TGFBR3	-0.901814	-6.08556	1.2e-06

## Sheet: Table 4
TABLE 4: Biological functions of significantly differentially expressed genes
	Category	Function Annotation	# Molecules	B-H multiple testing P value	Molecules
	Inflammatory Response	immune response	40	8.86e-14	CCL5, CD27, CD247, CD1C, CD79A, CD79B, CD8A, CLC, CTSW, CX3CR1, FLT3LG, FYN, GNLY, GZMA, HP, IGHG1, IL16, IL32, IL18R1, IL1R2, IL23A, IL2RB, IL7R, ITK, KLRK1, LAT, LCK, LY96, MAF, NCR3, POU2AF1, PRF1, SELL, SIT1, SKAP1, TBX21, TCF7, TGFBR3, TNFRSF10A (includes EG:8797), ZAP70
	Cell-To-Cell Signaling and Interaction	activation of cells	35	5.25e-13	AREG, CCL5, CD27, CD247, CD1C, CD8A, CLC, FLT3LG, FYN, GNLY, GZMA, GZMB, ICAM2, IGHG1, IL16, IL32, IL23A, IL2RB, ITGAL, ITK, KLRK1, LAT, LCK, LY96, MAF, MMP2, NCR3, POU2AF1, PRF1, SELL, SIT1, TBX21, TNFRSF10A (includes EG:8797), VEGFA, ZAP70
	Cell-To-Cell Signaling and Interaction	activation of eukaryotic cells	33	3e-12	AREG, CCL5, CD27, CD247, CD1C, CD8A, CLC, FLT3LG, FYN, GNLY, GZMA, GZMB, IGHG1, IL16, IL32, IL23A, IL2RB, ITK, KLRK1, LAT, LCK, LY96, MAF, MMP2, NCR3, POU2AF1, PRF1, SELL, SIT1, TBX21, TNFRSF10A (includes EG:8797), VEGFA, ZAP70
	Cell-To-Cell Signaling and Interaction	activation of normal cells	31	3.2e-12	AREG, CCL5, CD27, CD247, CD1C, CD8A, CLC, FLT3LG, FYN, GNLY, GZMA, GZMB, IGHG1, IL16, IL32, IL23A, IL2RB, ITK, KLRK1, LAT, LCK, LY96, MAF, NCR3, POU2AF1, PRF1, SELL, SIT1, TBX21, TNFRSF10A (includes EG:8797), VEGFA
	Inflammatory Response	activation of leukocytes	27	2.67e-11	CCL5, CD27, CD247, CD1C, CD8A, CLC, FLT3LG, FYN, GNLY, GZMA, IGHG1, IL16, IL23A, IL2RB, ITK, KLRK1, LAT, LCK, LY96, MAF, NCR3, POU2AF1, PRF1, SELL, SIT1, TBX21, TNFRSF10A (includes EG:8797)
	Inflammatory Response	activation of mononuclear leukocytes	22	3.18e-10	CCL5, CD27, CD247, CD1C, CD8A, CLC, FLT3LG, FYN, GZMA, IGHG1, IL23A, IL2RB, ITK, KLRK1, LAT, LCK, LY96, NCR3, POU2AF1, PRF1, SIT1, TBX21
	Cellular Development	developmental process of leukocytes	30	4.81e-10	BCL2, BCL6, CCL5, CD6, CD27, CD247, CFLAR, FANCA, FLT3LG, FYN, GZMB, IGHG1, IL10RA, IL23A, IL2RB, IL7R, ITGAL, ITK, LCK, MAF, MAP4K1, MLL, MMP9, NFATC2, RNASE1, TBX21, TCF7, TRA@, VEGFA, ZAP70
	Cellular Development	developmental process of lymphocytes	25	1.36e-09	BCL2, BCL6, CCL5, CD6, CD27, CD247, CFLAR, FLT3LG, FYN, GZMB, IGHG1, IL23A, IL2RB, IL7R, ITGAL, ITK, LCK, MAF, MAP4K1, NFATC2, TBX21, TCF7, TRA@, VEGFA, ZAP70
	Hematological System Development and Function	hematopoiesis	27	2.38e-09	BCL2, BCL6, CCL5, CD6, CD27, CD247, CFLAR, FLT3LG, FYN, GZMB, IGHG1, IL23A, IL2RB, IL7R, ITGAL, ITK, LCK, MAF, MAP4K1, MECOM, MLL, NFATC2, TBX21, TCF7, TRA@, VEGFA, ZAP70
	Inflammatory Response	activation of lymphocytes	20	2.57e-09	CCL5, CD27, CD247, CD1C, CD8A, CLC, FLT3LG, FYN, IGHG1, IL23A, IL2RB, ITK, KLRK1, LAT, LCK, NCR3, POU2AF1, PRF1, SIT1, TBX21
	Hematological System Development and Function	proliferation of leukocytes	23	7.04e-09	BCL2, BCL6, CD6, CD247, CD8A, FLT3LG, FYN, IGHG1, IL10RA, IL23A, IL2RB, IL7R, ITGAL, ITK, KLRK1, LCK, LILRB4 (includes EG:11006), MLL, MMP9, SLAMF7, TRA@, VSIG4, ZAP70
	Cellular Growth and Proliferation	proliferation of blood cells	24	7.07e-09	BCL2, BCL6, CD6, CD247, CD8A, FLT3LG, FYN, IGHG1, IL10RA, IL23A, IL2RB, IL7R, ITGAL, ITK, KLRK1, LCK, LILRB4 (includes EG:11006), MECOM, MLL, MMP9, SLAMF7, TRA@, VSIG4, ZAP70
	Cellular Function and Maintenance	Lymphocyte homeostasis	22	7.08e-09	BCL2, CCL5, CD6, CD247, CFLAR, FLT3LG, FYN, GZMB, IGHG1, IL23A, IL2RB, IL7R, ITGAL, ITK, LCK, MAF, MAP4K1, NFATC2, TBX21, TCF7, TRA@, ZAP70
	Hematological System Development and Function	development of lymphocytes	22	8.5e-09	BCL2, CCL5, CD6, CD247, CFLAR, FLT3LG, FYN, GZMB, IGHG1, IL23A, IL2RB, IL7R, ITGAL, ITK, LCK, MAF, MAP4K1, NFATC2, TBX21, TCF7, TRA@, ZAP70
	Cell-To-Cell Signaling and Interaction	response of cells	21	1.3e-08	BCL2, CCL5, CLC, CX3CR1, DUSP1, FAIM3, FLT3LG, GNLY, GZMA, IL10RA, IL1R2, IL23A, ITK, KLRC2, KLRG1, LY96, MAF, NFATC2, PRF1, TBX21, VNN1
	Hematological System Development and Function	proliferation of lymphocytes	21	5.06e-08	BCL2, BCL6, CD6, CD247, CD8A, FLT3LG, FYN, IGHG1, IL23A, IL2RB, IL7R, ITGAL, ITK, KLRK1, LCK, LILRB4 (includes EG:11006), MMP9, SLAMF7, TRA@, VSIG4, ZAP70
	Hematological System Development and Function	T cell development	20	1.02e-07	BCL2, CCL5, CD6, CD247, CFLAR, FYN, GZMB, IGHG1, IL23A, IL2RB, IL7R, ITK, LCK, MAF, MAP4K1, NFATC2, TBX21, TCF7, TRA@, ZAP70
	Hematological System Development and Function	proliferation of T lymphocytes	18	1.14e-07	BCL2, CD6, CD247, CD8A, FYN, IGHG1, IL23A, IL2RB, IL7R, ITGAL, ITK, KLRK1, LCK, LILRB4 (includes EG:11006), MMP9, TRA@, VSIG4, ZAP70
	Cellular Development	development of cells	31	4.93e-07	BCL2, CCL5, CD6, CD247, CD3G, CFLAR, DUSP1, FLT3LG, FYN, GZMB, IGHG1, IL23A, IL2RB, IL7R, ITGAL, ITK, KLRK1, KSR1, LCK, MAF, MAP4K1, MLL, MMP2, MMP9, NFATC2, SELL, TBX21, TCF7, TRA@, VEGFA, ZAP70
	Cellular Growth and Proliferation	proliferation of normal cells	29	1.93e-06	BCL2, BCL6, CCL5, CD6, CD247, CD8A, FLT3LG, FYN, IGHG1, IL10RA, IL23A, IL2RB, IL7R, ITGAL, ITK, KLRK1, LCK, LILRB4 (includes EG:11006), MECOM, MLL, MMP9, S1PR1, SLAMF7, TNFRSF10A (includes EG:8797), TRA@, VEGFA, VSIG4, WNT5A, ZAP70
	Cell Death	lysis of cells	11	2.5e-06	BCL2, CD8A, CX3CR1, GNLY, GZMA, GZMB, IGHG1, KLRK1, NCR3, PRF1, VEGFA
	Cell Signaling	mobilization of calcium	17	4.01e-06	CCL5, CD5, CD247, CD79B, CX3CR1, IL16, ITK, KLRC2, KLRK1, LAT, LCK, NCR3, RGS20, SELL, VEGFA, WNT5A, ZAP70
	Hematological System Development and Function	differentiation of leukocytes	17	1.13e-05	BCL2, BCL6, CD27, FLT3LG, IGHG1, IL23A, IL2RB, ITK, LCK, MAF, MLL, MMP9, NFATC2, TBX21, TRA@, VEGFA, ZAP70
	Inflammatory Disease	inflammatory disorder	62	1.46e-05	ABLIM1, AREG, ATM, BCL2, BCL6, CA1 (includes EG:759), CCL5, CD6, CD27, CD247, CD3D, CD3G, CD79A, CD79B, CD8A, CDC25B, CFLAR, CX3CR1, CXCR5, DUSP1, FCRL3, FLT3LG, FYN, GNLY, GZMA, GZMB, HIST1H2AC, HLA-DMA, HLA-DQA1, HP, IGHG1, IL16, IL10RA, IL18R1, IL1R2, IL23A, IL2RB, IL7R, ITGAL, ITPKB, KLRB1, KSR1, LCK, MAP4K1, MECOM, MMP2, MMP9, NAMPT, NFATC2, OAS2, POLR2B, PRF1, RBM47, RUNX3, S1PR1, SAMSN1, T…
	Cancer	lymphatic node tumor	14	1.47e-05	ATM, BCL2, BCL6, CD247, CD3D, CD3G, CFLAR, FYN, IL2RB, LCK, MAP4K1, PRF1, TNFRSF10A (includes EG:8797), VEGFA
	Inflammatory Response	activation of T lymphocytes	13	1.51e-05	CCL5, CD247, CD8A, CLC, FYN, IGHG1, IL23A, ITK, LAT, LCK, PRF1, SIT1, TBX21
	Cellular Development	differentiation of cells	30	1.73e-05	AREG, ATM, BCL2, BCL6, CD27, CREG1, CTSK, CXCR5, DUSP1, FLT3LG, IGHG1, IL32, IL23A, IL2RB, ITK, LCK, MAF, MAP4K1, MLL, MMP2, MMP9, NFATC2, RASGRP1, SFRP1, SIAH2, TBX21, TRA@, VEGFA, WNT5A, ZAP70
	Hematological System Development and Function	differentiation of blood cells	18	1.97e-05	BCL2, BCL6, CD27, FLT3LG, IGHG1, IL23A, IL2RB, ITK, LCK, MAF, MAP4K1, MLL, MMP9, NFATC2, TBX21, TRA@, VEGFA, ZAP70
	Hematological System Development and Function	differentiation of lymphocytes	13	2.37e-05	BCL6, CD27, IGHG1, IL23A, IL2RB, ITK, LCK, MAF, NFATC2, TBX21, TRA@, VEGFA, ZAP70
	Inflammatory Disease	rheumatic disease	44	2.48e-05	ABLIM1, AREG, ATM, BCL2, BCL6, CCL5, CD6, CD27, CD3D, CD79A, CD79B, CDC25B, CFLAR, CXCR5, DUSP1, FCRL3, FYN, GNLY, GZMA, GZMB, HIST1H2AC, HLA-DMA, HLA-DQA1, HP, IGHG1, IL16, IL10RA, IL18R1, IL1R2, IL2RB, IL7R, ITGAL, ITPKB, LCK, MAP4K1, MMP2, MMP9, NAMPT, NFATC2, RUNX3, S1PR1, TCF7, TRA@, VSIG4
	Post-Translational Modification	phosphorylation of protein	15	3.16e-05	ATM, BCL2, CCL5, CD5, CD247, CD79A, CD79B, CD8A, DUSP1, FCRL5, FYN, LCK, SELL, VEGFA, ZAP70
	Immune Cell Trafficking	migration of mononuclear leukocytes	14	3.52e-05	CCL5, CD247, FLT3LG, GNLY, ICAM2, IL16, ITGAL, ITK, LCK, MMP9, RASGRP1, S1PR1, SELL, VEGFA
	Cell Signaling	tyrosine phosphorylation of protein	13	3.52e-05	CCL5, CD5, CD247, CD79A, CD79B, CD8A, DUSP1, FCRL5, FYN, LCK, SELL, VEGFA, ZAP70
	Cell Death	cytotoxicity of cells	11	3.85e-05	BCL2, CCL5, CD6, GZMB, IGHG1, ITK, KLRK1, LAT, NCR3, PRF1, SLAMF7
	Cancer	non-hodgkin lymphoma	13	5.04e-05	ATM, BCL2, BCL6, CD247, CD3D, CD3G, CFLAR, FYN, IL2RB, LCK, MAP4K1, PRF1, TNFRSF10A (includes EG:8797)
	Inflammatory Disease	arthritis	42	5.39e-05	ABLIM1, AREG, ATM, BCL2, BCL6, CCL5, CD6, CD27, CD3D, CD79A, CD79B, CDC25B, CFLAR, CXCR5, DUSP1, FCRL3, FYN, GNLY, GZMA, GZMB, HIST1H2AC, HLA-DMA, HLA-DQA1, HP, IGHG1, IL10RA, IL18R1, IL1R2, IL2RB, IL7R, ITGAL, ITPKB, MAP4K1, MMP2, MMP9, NAMPT, NFATC2, RUNX3, S1PR1, TCF7, TRA@, VSIG4
	Cell Death	cytolysis of cells	8	6.51e-05	BCL2, CX3CR1, GNLY, GZMA, GZMB, IGHG1, KLRK1, PRF1
	Cell Death	lysis of eukaryotic cells	8	8.82e-05	BCL2, CX3CR1, GNLY, GZMB, KLRK1, NCR3, PRF1, VEGFA
	Cell Death	cell death of lymphocytes	13	9.16e-05	BCL2, CCL5, CD5, CD27, CD247, CFLAR, GZMB, IL7R, ITGAL, LCK, MAP4K1, TBX21, VEGFA
	Cell Death	cytotoxicity of eukaryotic cells	10	0.000129	BCL2, CCL5, CD6, GZMB, IGHG1, ITK, KLRK1, LAT, NCR3, PRF1
	Inflammatory Disease	psoriatic arthritis	8	0.000202	CD27, CD79B, CDC25B, IGHG1, ITGAL, MAP4K1, RUNX3, TCF7
	Immune Cell Trafficking	Lymphocyte migration	12	0.000226	CCL5, CD247, FLT3LG, GNLY, ICAM2, IL16, ITGAL, ITK, LCK, RASGRP1, S1PR1, SELL
	Hematological System Development and Function	differentiation of T lymphocytes	10	0.000292	IGHG1, IL23A, IL2RB, ITK, LCK, MAF, NFATC2, TBX21, TRA@, ZAP70
	Respiratory Disease	respiratory disorder	19	0.000309	ARL4C, CCL5, CD247, CD8A, CLC, CX3CR1, FLT3LG, GYG1, HIST1H2AC, HIST2H2AA3, HP, IL16, IL10RA, ITK, LCK, MMP9, NAMPT, TBX21, VEGFA
	Cellular Growth and Proliferation	proliferation of eukaryotic cells	37	0.000309	AREG, ATM, BCL2, BCL6, CCL5, CD6, CD247, CD8A, CDC25B, CLC, FLT3LG, FYN, IGHG1, IL16, IL10RA, IL23A, IL2RB, IL7R, ITGAL, ITK, KLRK1, LCK, LILRB4 (includes EG:11006), MECOM, MLL, MMP9, RUNX3, S1PR1, SFRP1, SLAMF7, TGFBR3, TNFRSF10A (includes EG:8797), TRA@, VEGFA, VSIG4, WNT5A, ZAP70
	Inflammatory Response	activation of natural killer cells	7	0.000342	CCL5, CD27, FLT3LG, IL2RB, KLRK1, NCR3, PRF1
	Cell Death	cytolysis of eukaryotic cells	6	0.00036	BCL2, CX3CR1, GNLY, GZMB, KLRK1, PRF1
	Cell Death	apoptosis of lymphocytes	11	0.000385	BCL2, CCL5, CD5, CD27, CD247, CFLAR, GZMB, IL7R, LCK, MAP4K1, VEGFA
	Respiratory Disease	severe acute respiratory syndrome	10	0.000396	ARL4C, CD247, CLC, GYG1, HIST1H2AC, HIST2H2AA3, HP, IL10RA, ITK, LCK
	Cancer	lymphoma	14	0.000396	ATM, BCL2, BCL6, CD247, CD3D, CD3G, CFLAR, FYN, IL2RB, LCK, MAP4K1, PRF1, TNFRSF10A (includes EG:8797), VEGFA

## Sheet: Table 5 
Table 5: Key canonical pathways represented in the dataset of significantly differentially expressed genes
	T cell receptor signalling (BH P value: 1.47E-11, ratio 14.6%)
	HUGO Gene Symbol/Unigene ID	Entrez Gene ID for Human	Entrez Gene Name	Location	Type(s)
	ATM	472	ATM serine/threonine kinase	Nucleus	kinase
	CD247	919	CD247 molecule	Plasma Membrane	transmembrane receptor
	CD3D	915	CD3d molecule, delta (CD3-TCR complex)	Plasma Membrane	transmembrane receptor
	CD3G	917	CD3g molecule, gamma (CD3-TCR complex)	Plasma Membrane	transmembrane receptor
	CD8A	925	CD8a molecule	Plasma Membrane	other
	CD8B	926	CD8b molecule	Plasma Membrane	other
	FYN	2534	FYN oncogene related to SRC, FGR, YES	Plasma Membrane	kinase
	ITK	3702	IL2-inducible T-cell kinase	Cytoplasm	kinase
	LAT	27040	linker for activation of T cells	Plasma Membrane	other
	LCK	3932	lymphocyte-specific protein tyrosine kinase	Cytoplasm	kinase
	NFATC2	4773	nuclear factor of activated T-cells, cytoplasmic, calcineurin-dependent 2	Nucleus	transcription regulator
	RASGRP1	10125	RAS guanyl releasing protein 1 (calcium and DAG-regulated)	Cytoplasm	other
	TRA	6955	T cell receptor alpha locus	Cytoplasm	other
	ZAP70	7535	zeta-chain (TCR) associated protein kinase 70kDa	Plasma Membrane	kinase
	Cytotoxic T lymphocyte-mediated apoptosis of target cells (BH P value: 1.83E-07, ratio 22.6%)
	HUGO Gene Symbol/Unigene ID	Entrez Gene ID for Human	Entrez Gene Name	Location	Type(s)
	PRF1	5551	perforin 1 (pore forming protein)	Cytoplasm	other
	GZMB	3002	granzyme B (granzyme 2, cytotoxic T-lymphocyte-associated serine esterase 1)	Cytoplasm	peptidase
	TRA	6955	T cell receptor alpha locus	Cytoplasm	other
	CD247	919	CD247 molecule	Plasma Membrane	transmembrane receptor
	CD3G	917	CD3g molecule, gamma (CD3-TCR complex)	Plasma Membrane	transmembrane receptor
	CD3D	915	CD3d molecule, delta (CD3-TCR complex)	Plasma Membrane	transmembrane receptor
	BCL2	596	B-cell CLL/lymphoma 2	Cytoplasm	other
	iCOS-iCOSL signaling in T helper cells (BH P value: 4.09E-10, ratio 12.6%)
	HUGO Gene Symbol/Unigene ID	Entrez Gene ID for Human	Entrez Gene Name	Location	Type(s)
	IL2RB	3560	interleukin 2 receptor, beta	Plasma Membrane	transmembrane receptor
	TRA	6955	T cell receptor alpha locus	Cytoplasm	other
	NFATC2	4773	nuclear factor of activated T-cells, cytoplasmic, calcineurin-dependent 2	Nucleus	transcription regulator
	LCK	3932	lymphocyte-specific protein tyrosine kinase	Cytoplasm	kinase
	LAT	27040	linker for activation of T cells	Plasma Membrane	other
	ZAP70	7535	zeta-chain (TCR) associated protein kinase 70kDa	Plasma Membrane	kinase
	CD247	919	CD247 molecule	Plasma Membrane	transmembrane receptor
	CD3G	917	CD3g molecule, gamma (CD3-TCR complex)	Plasma Membrane	transmembrane receptor
	CD3D	915	CD3d molecule, delta (CD3-TCR complex)	Plasma Membrane	transmembrane receptor
	HLA-DQA1	3117	major histocompatibility complex, class II, DQ alpha 1	Plasma Membrane	transmembrane receptor
	ATM	472	ATM serine/threonine kinase	Nucleus	kinase
	HLA-DMA	3108	major histocompatibility complex, class II, DM alpha	Plasma Membrane	transmembrane receptor
	ITK	3702	IL2-inducible T-cell kinase	Cytoplasm	kinase
	Calcium-induced T lymphocyte (BH P value: 4.39E-08, ratio 15.5%)
	HUGO Gene Symbol/Unigene ID	Entrez Gene ID for Human	Entrez Gene Name	Location	Type(s)
	TRA	6955	T cell receptor alpha locus	Cytoplasm	other
	NFATC2	4773	nuclear factor of activated T-cells, cytoplasmic, calcineurin-dependent 2	Nucleus	transcription regulator
	LCK	3932	lymphocyte-specific protein tyrosine kinase	Cytoplasm	kinase
	ZAP70	7535	zeta-chain (TCR) associated protein kinase 70kDa	Plasma Membrane	kinase
	CD247	919	CD247 molecule	Plasma Membrane	transmembrane receptor
	CD3G	917	CD3g molecule, gamma (CD3-TCR complex)	Plasma Membrane	transmembrane receptor
	CD3D	915	CD3d molecule, delta (CD3-TCR complex)	Plasma Membrane	transmembrane receptor
	HLA-DQA1	3117	major histocompatibility complex, class II, DQ alpha 1	Plasma Membrane	transmembrane receptor
	HLA-DMA	3108	major histocompatibility complex, class II, DM alpha	Plasma Membrane	transmembrane receptor
	CD28 Signaling in T helper cells (BH P value: 6.84E-10, ratio 11.5%)
	HUGO Gene Symbol/Unigene ID	Entrez Gene ID for Human	Entrez Gene Name	Location	Type(s)
	TRA	6955	T cell receptor alpha locus	Cytoplasm	other
	NFATC2	4773	nuclear factor of activated T-cells, cytoplasmic, calcineurin-dependent 2	Nucleus	transcription regulator
	LCK	3932	lymphocyte-specific protein tyrosine kinase	Cytoplasm	kinase
	LAT	27040	linker for activation of T cells	Plasma Membrane	other
	ZAP70	7535	zeta-chain (TCR) associated protein kinase 70kDa	Plasma Membrane	kinase
	CD247	919	CD247 molecule	Plasma Membrane	transmembrane receptor
	CD3G	917	CD3g molecule, gamma (CD3-TCR complex)	Plasma Membrane	transmembrane receptor
	CD3D	915	CD3d molecule, delta (CD3-TCR complex)	Plasma Membrane	transmembrane receptor
	HLA-DMA	3108	major histocompatibility complex, class II, DM alpha	Plasma Membrane	transmembrane receptor
	ITK	3702	IL2-inducible T-cell kinase	Cytoplasm	kinase
	HLA-DQA1	3117	major histocompatibility complex, class II, DQ alpha 1	Plasma Membrane	transmembrane receptor
	ATM	472	ATM serine/threonine kinase	Nucleus	kinase
	FYN	2534	FYN oncogene related to SRC, FGR, YES	Plasma Membrane	kinase

## Sheet: Table 6
Table 6: Comparison of genes expressed in individual unstimulated cell subpopulations (Waddell et al, 2010) with dataset from Cohort 1
		Waddell dataset	Dataset from Cohort 1
		Genes expressed	Absent in dataset		NS (FDR>0.1) in dataset		Significant (FDR<0.1) in dataset
		Total	Total	%	Total	%	Total	%	UP	%	DOWN	%
	CD4 cell	17	0	0	17	100	0	0	0	0	0	0
	CD8 cell	25	0	0	23	92	2	8	0	0	2	8
	T cell	210	8	3.80952	186	88.5714	16	7.61905	0	0	16	7.61905
	B cell	179	2	1.11732	174	97.2067	3	1.67598	0	0	3	1.67598
	NK cell	161	3	1.86335	145	90.0621	13	8.07453	0	0	13	8.07453
	Monocyte	1042	17	1.63148	1006	96.5451	19	1.82342	18	1.72745	1	0.0959693
	Absent = Not represented in TBM array
	NS = Not significantly differentially expressed (SDE)

## Sheet: Table 7
Table 7: Comparison of genes expressed in PBMCs stimulated with type 1 and 2 interferons and TNF (Waddell et al, 2010) with dataset from Cohort 1
		Waddell dataset			Dataset from Cohort 1
		Genes expressed			Absent in dataset		NS (FDR>0.1) in dataset		Significant (FDR<0.1) in dataset
		Total	up	down	Total	%	Total	%	Total	%	UP	%	DOWN	%
	IFNa	257	226	31	6	2.33463	244	94.9416	7	2.72374	6	2.65487	1	3.22581
	IFNb	484	370	114	11	2.27273	462	95.4545	11	2.27273	9	2.43243	2	1.75439
	IFNw	377	288	89	10	2.65252	356	94.4297	11	2.91777	8	2.77778	3	3.37079
	IFNg	188	111	77	3	1.59574	177	94.1489	8	4.25532	7	6.30631	1	1.2987
	TNFa	255	130	125	14	5.4902	233	91.3725	8	3.13725	5	3.84615	3	2.4
	Absent = Not represented in array
	NS = Not significantly differentially expressed (SDE)

## Sheet: Table 8
Table 8: Comparison of genes expressed in cell subtypes stimulated with IFN-g (Waddell et al, 2010) with dataset from Cohort 1
		Waddell dataset	Dataset from Cohort 1
		Genes expressed	Absent in dataset		NS (FDR>0.1) in dataset		Significant (FDR<0.1) in dataset
		Total	Total	%	Total	%	Total	%	UP	%	DOWN	%
	B cell	80	1	1.25	76	95	3	3.75	3	3.75	0	0
	CD4	36	0	0	34	94.4444	2	5.55556	2	5.55556	0	0
	CD8	21	0	0	19	90.4762	2	9.52381	2	9.52381	0	0
	NK cell	17	0	0	16	94.1176	1	5.88235	1	5.88235	0	0
	Monocyte	294	4	1.36054	283	96.2585	7	2.38095	3	1.02041	4	1.36054
	Absent = Not represented in Stanford array
	NS = Not significantly differentially expressed

## Sheet: Table 9
Table 9: Probes used for quantitative Real Time RT-PCR validation in TBM patients.
	GENE SYMBOL	APPLIED BIOSYSTEMS ASSAY ID (PRE-INVENTORIED)
	ACTB	Hs03023943_g1, CYT1140000,1140100000
	AREG	Hs00155832_m1,SIG1020000,1020300000
	CD3D	Hs00174158_m1,DEF1250000,1250500000
	CD3G	Hs00962186_m1,DEF1250000,1250500000
	LAT	Hs00175561_m1,MOL1980000,1980000000
	LCK	Hs00178427_m1,KIN1030000,1030100000
	NFATC2	Hs00905451_m1,TRA1080000,1089900000
	NFATC3	Hs00190046_m1,TRA1080000,1089900000
	SLC7A5	Hs00185826_m1,TRA1110000,1110400000
	TRA	Hs00612238_m1,MOL1980000,1980000000
	ZAP70	Hs00896347_m1,KIN1030000,1030100000
	ACTB acted as the House Keeping gene, Positive controls (not in the TCR signalling pathway) were SLC7A5 and AREG

[truncated: 1 more sheets: Table 10]
